# Supplementary material for: Randomized Controlled Evaluation of a Group-Based Training for Parents of Adolescents with Gaming Disorder or Social Network Use Disorder
Source: MDPI journal article supplement (doi:10.3390/ijerph20010272), 2022-12-24
Supplement: s1 [file s1]

**Supplementary Table S1:** All results of parent-child relationship before and after ISES! Group Training or the waiting period.

| Scales                                         |            | pre<br><i>M (SD)</i> | post<br><i>M (SD)</i> | $\eta_p^2$ | time x group<br>F <i>p</i> |       |
|------------------------------------------------|------------|----------------------|-----------------------|------------|----------------------------|-------|
| PRSQ-P cohesion – parents' view                | IG (N=33)  | 2.95 (0.56)          | 2.98 (0.58)           | 0.01       | 0.71                       | 0.400 |
|                                                | CG (N= 26) | 2.88 (0.63)          | 2.82 (0.55)           |            |                            |       |
| PRSQ-P cohesion – father's view                | IG (N= 14) | 2.89 (0.59)          | 2.86 (0.57)           | 0.06       | 1.26                       | 0.274 |
|                                                | CG (N=9)   | 2.49 (0.71)          | 2.62 (0.63)           |            |                            |       |
| PRSQ-P autonomy – parents' view                | IG (N=32)  | 2.52 (0.47)          | 2.41 (0.52)           | 0.03       | 1.68                       | 0.200 |
|                                                | CG (N=25)  | 2.59 (0.41)          | 2.60 (0.45)           |            |                            |       |
| PRSQ-P autonomy – mother's view                | IG (N=19)  | 2.45 (0.49)          | 2.33 (0.53)           | 0.02       | 0.56                       | 0.460 |
|                                                | CG (N=16)  | 2.61 (0.43)          | 2.58 (0.51)           |            |                            |       |
| PRSQ-P autonomy – father's view                | IG (N=13)  | 2.62 (0.43)          | 2.52 (0.52)           | 0.063      | 1.34                       | 0.063 |
|                                                | CG (N=9)   | 2.56 (0.39)          | 2.64 (0.33)           |            |                            |       |
| PRSQ-P resources - parents' view               | IG (N=33)  | 2.71 (0.39)          | 2.67 (0.41)           | 0.00       | 0.02                       | 0.890 |
|                                                | CG (N=26)  | 2.72 (0.41)          | 2.69 (0.39)           |            |                            |       |
| PRSQ-P resources – father's view               | IG (N=14)  | 2.70 (0.40)          | 2.63 (0.40)           | 0.17       | 4.21                       | 0.053 |
|                                                | CG (N=9)   | 2.52 (0.40)          | 2.63 (0.2.6)          |            |                            |       |
| PRSQ-P resources – mother view                 | IG (N=19)  | 2.72 (0.39)          | 2.70 (0.37)           | 0.02       | 0.71                       | 0.405 |
|                                                | CG (N=17)  | 2.82 (0.38)          | 2.71 (0.45)           |            |                            |       |
| PRSQ-P conflicts – parents' view               | IG (N=33)  | 2.36 (0.57)          | 2.30 (0.55)           | 0.04       | 2.44                       | 0.120 |
|                                                | CG (N=25)  | 2.15 (0.55)          | 2.22 (0.65)           |            |                            |       |
| PRSQ-P conflicts – mother's view               | IG (N=19)  | 2.37 (0.653)         | 2.32 (0.59)           | 0.02       | 0.51                       | 0.479 |
|                                                | CG (N=16)  | 2.19 (0.57)          | 2.22 (0.66)           |            |                            |       |
| PRSQ-P conflicts – father's view               | IG (N=14)  | 2.36 (0.46)          | 2.27 (0.51)           | 0.11       | 2.70                       | 0.115 |
|                                                | CG (N=9)   | 2.08 (0.53)          | 2.22 (0.67)           |            |                            |       |
| PRSQ-P punishment – parents' view              | IG (N=32)  | 0.34 (0.35)          | 0.36 (0.32)           | 0.00       | 0.01                       | 0.940 |
|                                                | CG (N=26)  | 0.28 (0.31)          | 0.31 (0.34)           |            |                            |       |
| PRSQ-P punishment – mother's view              | IG (N=19)  | 0.33 (0.35)          | 0.35 (0.34)           | 0.01       | 0.43                       | 0.518 |
|                                                | CG (N=17)  | 0.33 (0.35)          | 0.29 (0.33)           |            |                            |       |
| PRSQ-P punishment – father's view              | IG (N=13)  | 0.36 (0.37)          | 0.38 (0.30)           | 0.06       | 1.30                       | 0.270 |
|                                                | CG (N=9)   | 0.19 (0.18)          | 0.33 (0.37)           |            |                            |       |
| PRSQ-P rejection - parents' view               | IG (N=32)  | 0.27 (0.36)          | 0.27 (0.35)           | 0.01       | 0.30                       | 0.590 |
|                                                | CG (N=25)  | 0.22 (0.28)          | 0.19 (0.28)           |            |                            |       |
| PRSQ-P rejection - mother's view               | IG (N=19)  | 0.30 (0.41)          | 0.26 (0.28)           | 0.01       | 0.19                       | 0.668 |
|                                                | CG (N=17)  | 0.18 (0.23)          | 0.18 (0.26)           |            |                            |       |
| PRSQ-P rejection - father's view               | IG (N=13)  | 0.21 (0.29)          | 0.29 (0.44)           | 0.12       | 2.64                       | 0.121 |
|                                                | CG (N=8)   | 0.31 (0.37)          | 0.22 (0.34)           |            |                            |       |
| PRSQ-P fears/overprotection -<br>parents' view | IG (N= 32) | 1.77 (0.75)          | 1.96 (0.86)           | 0.03       | 1.89                       | 0.170 |
|                                                | CG (N=26)  | 1.88 (0.80)          | 1.91 (0.92)           |            |                            |       |
| PRSQ-P fears/overprotection -<br>mother's view | IG (N=18)  | 1.83 (0.66)          | 2.07 (0.81)           | 0.02       | 0.02                       | 0.442 |
|                                                | CG (N=17)  | 2.04 (0.87)          | 2.16 (0.90)           |            |                            |       |
| PRSQ-P fears/overprotection - father's<br>view | IG (N=14)  | 1.68 (0.87)          | 1.82 (0.94)           | 0.09       | 1.98                       | 0.174 |
|                                                | CG (N=9)   | 1.58 (0.59)          | 1.44 (0.80)           |            |                            |       |
| PRSQ-P aid - parents' view                     | IG (N=33)  | 1.11 (0.50)          | 1.11 (0.50)           | 0.04       | 2.17                       | 0.150 |
|                                                | CG (N=25)  | 0.93 (0.45)          | 0.76 (0.42)           |            |                            |       |
| PRSQ-P aid - father's view                     | IG (N=14)  | 1.11 (0.52)          | 1.02 (0.41)           | 0.00       | 0.00                       | 0.97  |
|                                                | CG (N=9)   | 0.92 (0.35)          | 0.83 (0.42)           |            |                            |       |
|                                                | IG (N=14)  | 1.16 (0.51)          | 1.21 (0.40)           | 0.03       | 0.57                       | 0.458 |

|                                         |           |             |             |      |      |       |
|-----------------------------------------|-----------|-------------|-------------|------|------|-------|
| PRSQ-P emotional burden - father's view | CG (N=9)  | 0.81 (0.33) | 0.72 (0.40) |      |      |       |
| PRSQ-P risk - parents' view             | IG (N=33) | 1.24 (0.32) | 1.30 (0.31) | 0.03 | 1.55 | 0.220 |
|                                         | CG (N=26) | 1.15 (0.31) | 1.14 (0.37) |      |      |       |
| PRSQ-P risk - mother's view             | IG (N=19) | 1.29 (0.31) | 1.34 (0.26) | 0.02 | 0.77 | 0.387 |
|                                         | CG (N=17) | 1.22 (0.33) | 1.21 (0.37) |      |      |       |
| PRSQ-P risk - father's view             | IG (N=14) | 1.17 (0.33) | 1.23 (0.36) | 0.04 | 0.76 | 0.390 |
|                                         | CG (N=9)  | 1.02 (0.25) | 1.02 (0.34) |      |      |       |
| PRSQ-P total value - parents' view      | IG (N=28) | 1.54 (0.51) | 1.46 (0.50) | 0.01 | 0.17 | 0.690 |
|                                         | CG (N=22) | 1.69 (0.46) | 1.66 (0.54) |      |      |       |
| PRSQ-P total value - mother's view      | IG (N=17) | 1.40 (0.60) | 1.31 (0.52) | 0.00 | 0.00 | 1.000 |
|                                         | CG (N=14) | 1.74 (0.46) | 1.65 (0.64) |      |      |       |
| PRSQ-P total value - father's view      | IG (N=11) | 1.74 (0.26) | 1.70 (0.36) | 0.06 | 1.16 | 0.297 |
|                                         | CG (N=8)  | 1.61 (0.48) | 1.69 (0.32) |      |      |       |

Note: IG = intervention group; CG = control group; EKI = Parent-Child Inventory;  
PRSQ-P = Parental Representation Screening Questionnaire – Parental Version
